# Supplementary material for: Mash-based analyses of Escherichia coli genomes reveal 14 distinct phylogroups
Source: PubMed Central journal article supplement (PMC7838162; doi:10.1038/s42003-020-01626-5), 2021-01-26
Supplement: 42003_2020_1626_MOESM1_ESM.pdf [file 42003_2020_1626_MOESM1_ESM.pdf]

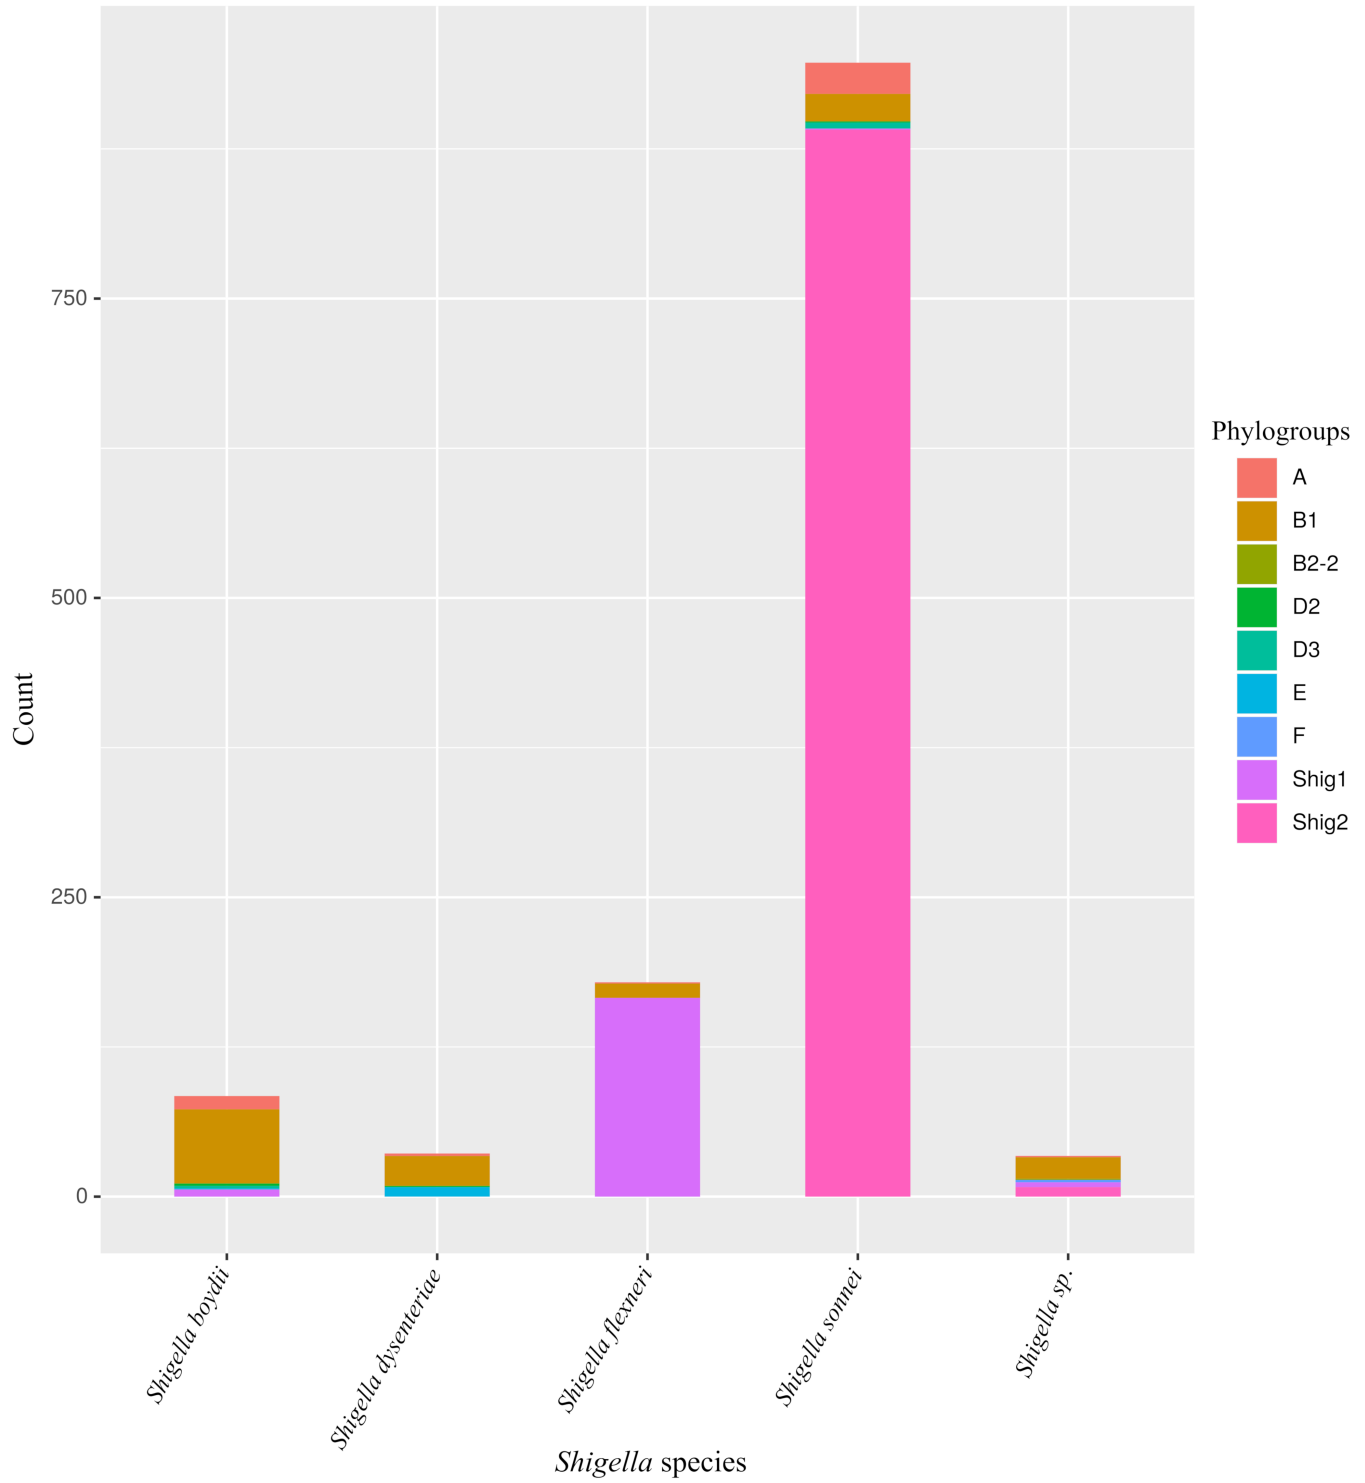

**Supplementary Figure 1**  
 Distribution of *Shigella* genomes over phylogroups

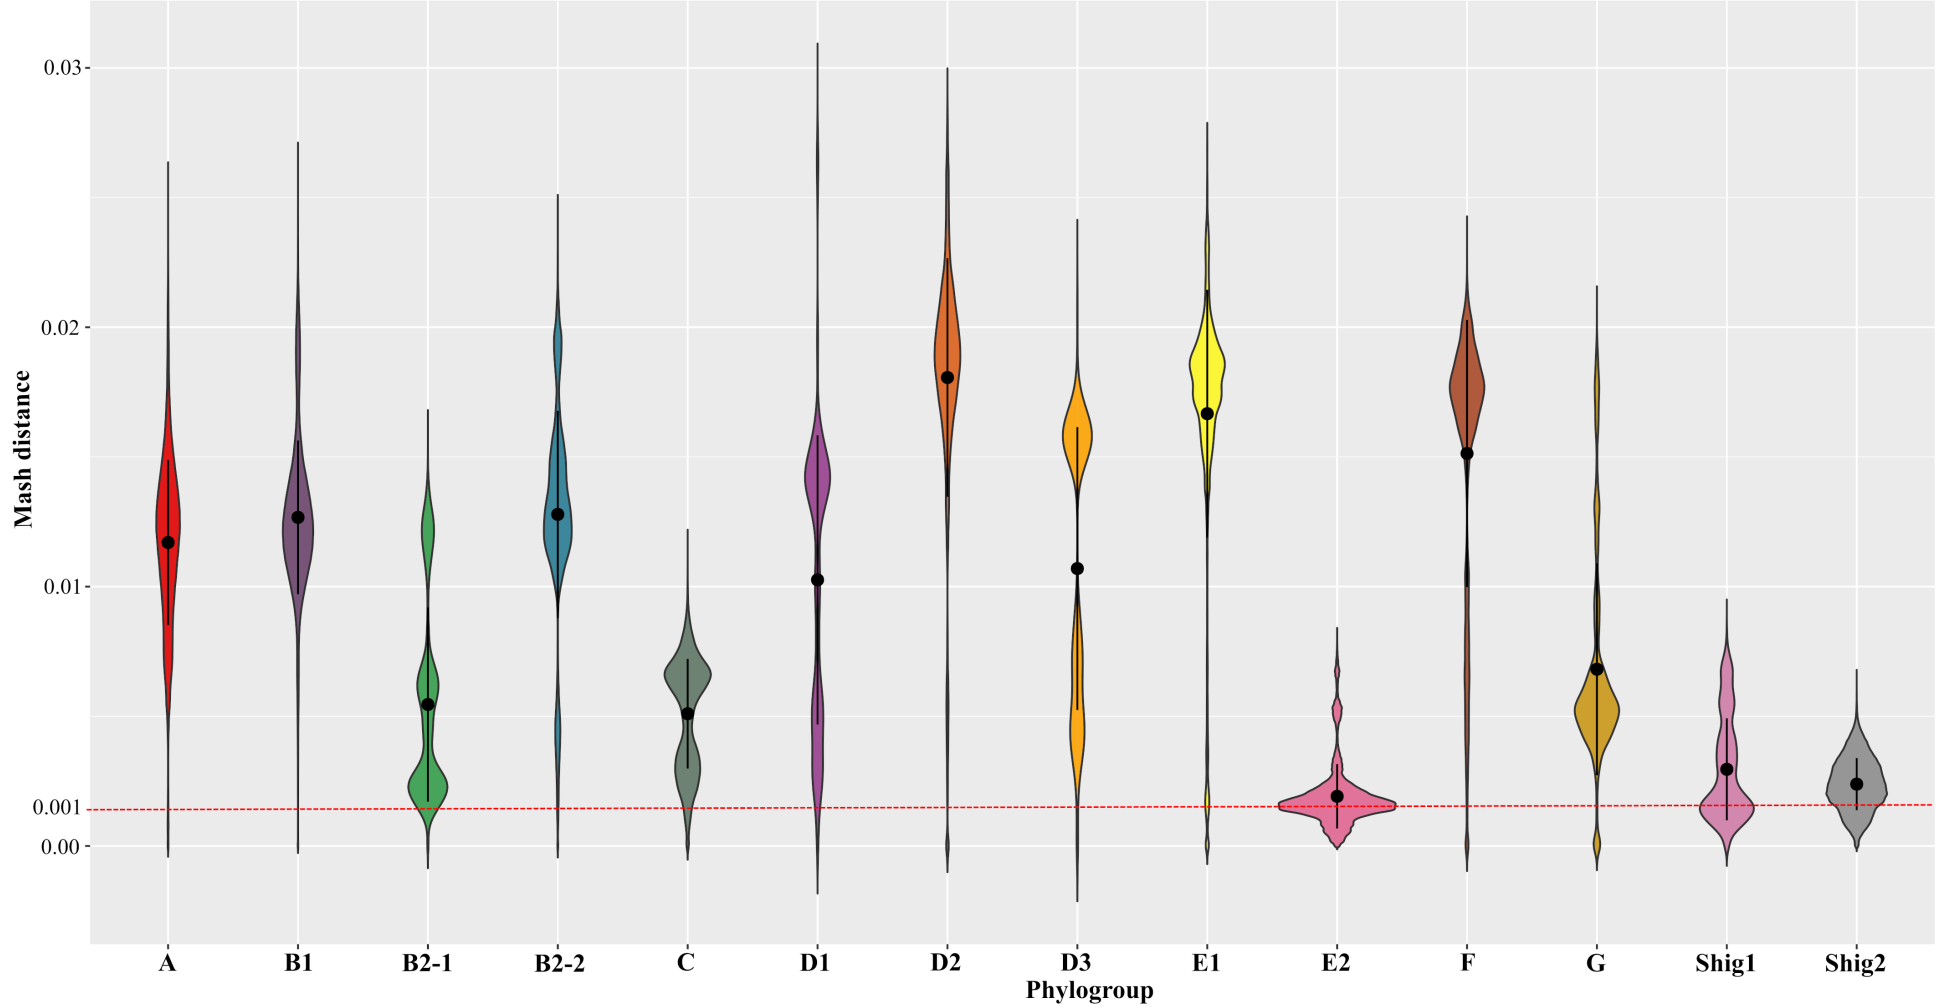

**Supplementary Figure 2**

Violin plots of the distribution of Mash distances per phylogroup. The red line corresponds to the Mash distance described as the cut-off for strain clonality according to the literature<sup>53</sup>

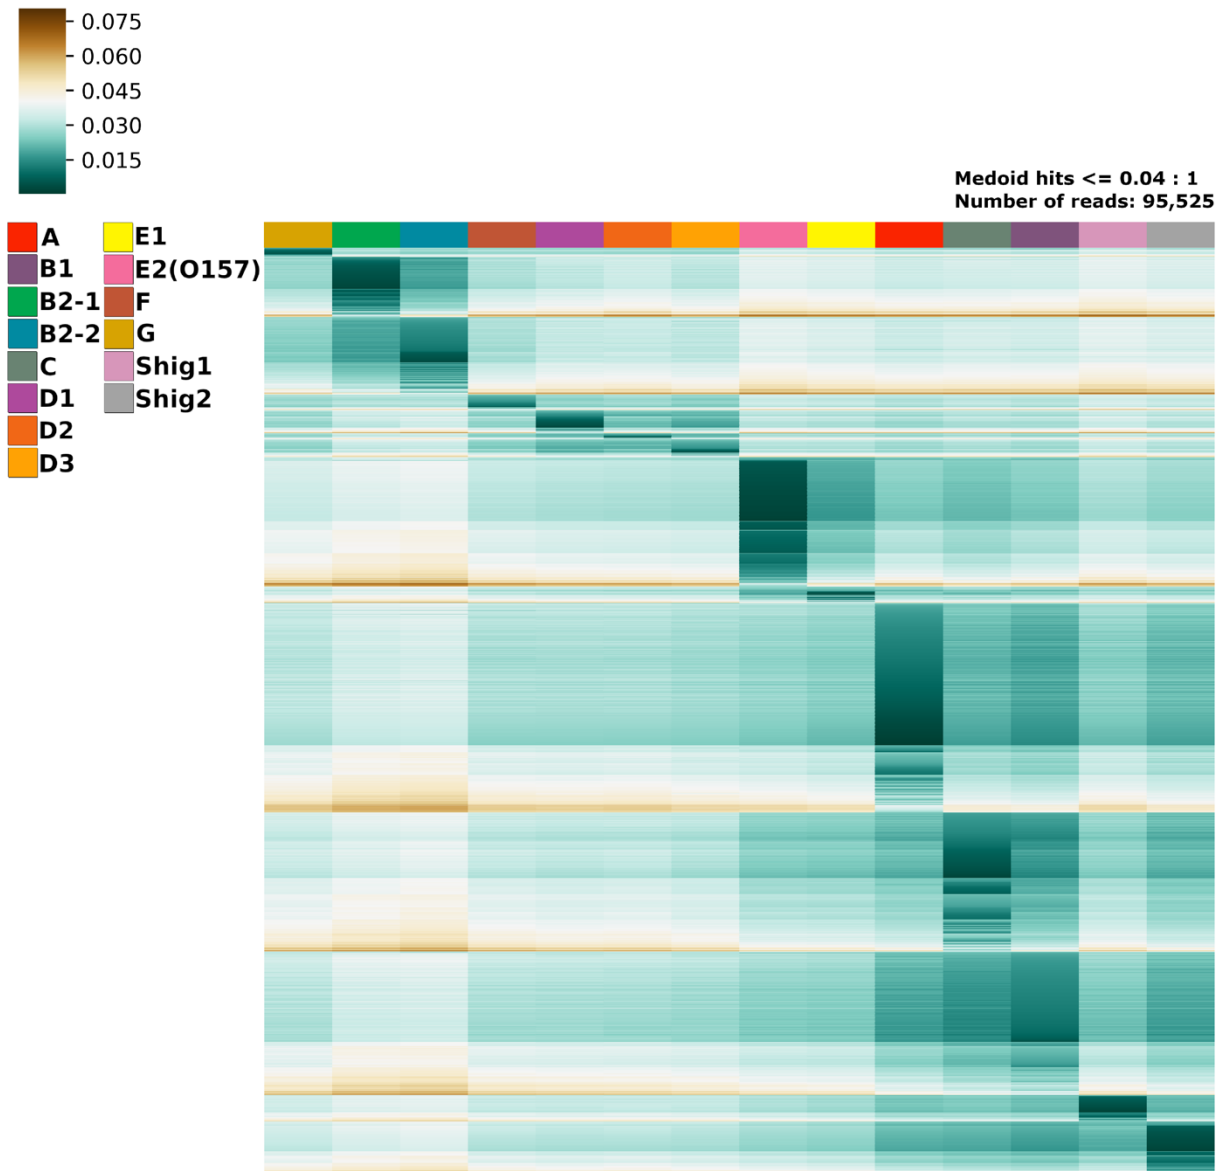

### Supplementary Figure 3

Heatmap of Mash distances for 95,525 SRA reads to each of the 14 medoids. Reads were filtered to any read with a Mash distance  $\leq 0.04$  to at least 1 medoid.

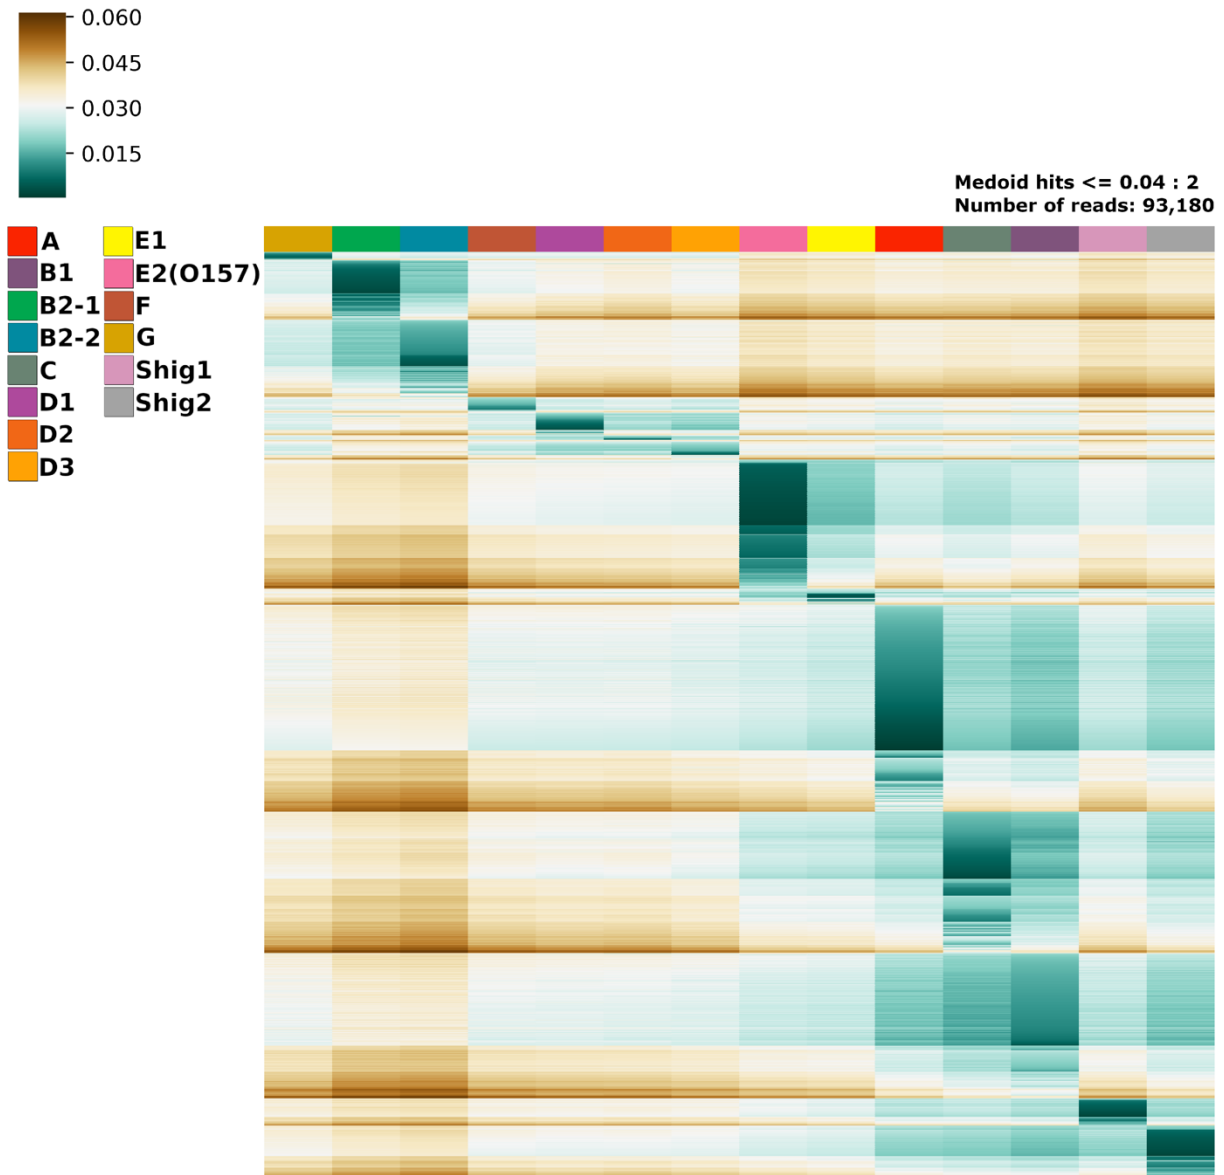

#### Supplementary Figure 4

Heatmap of Mash distances for 93,180 SRA reads to each of the 14 medoids. Reads were filtered to any read with a Mash distance  $\leq 0.04$  to at least 2 medoids.

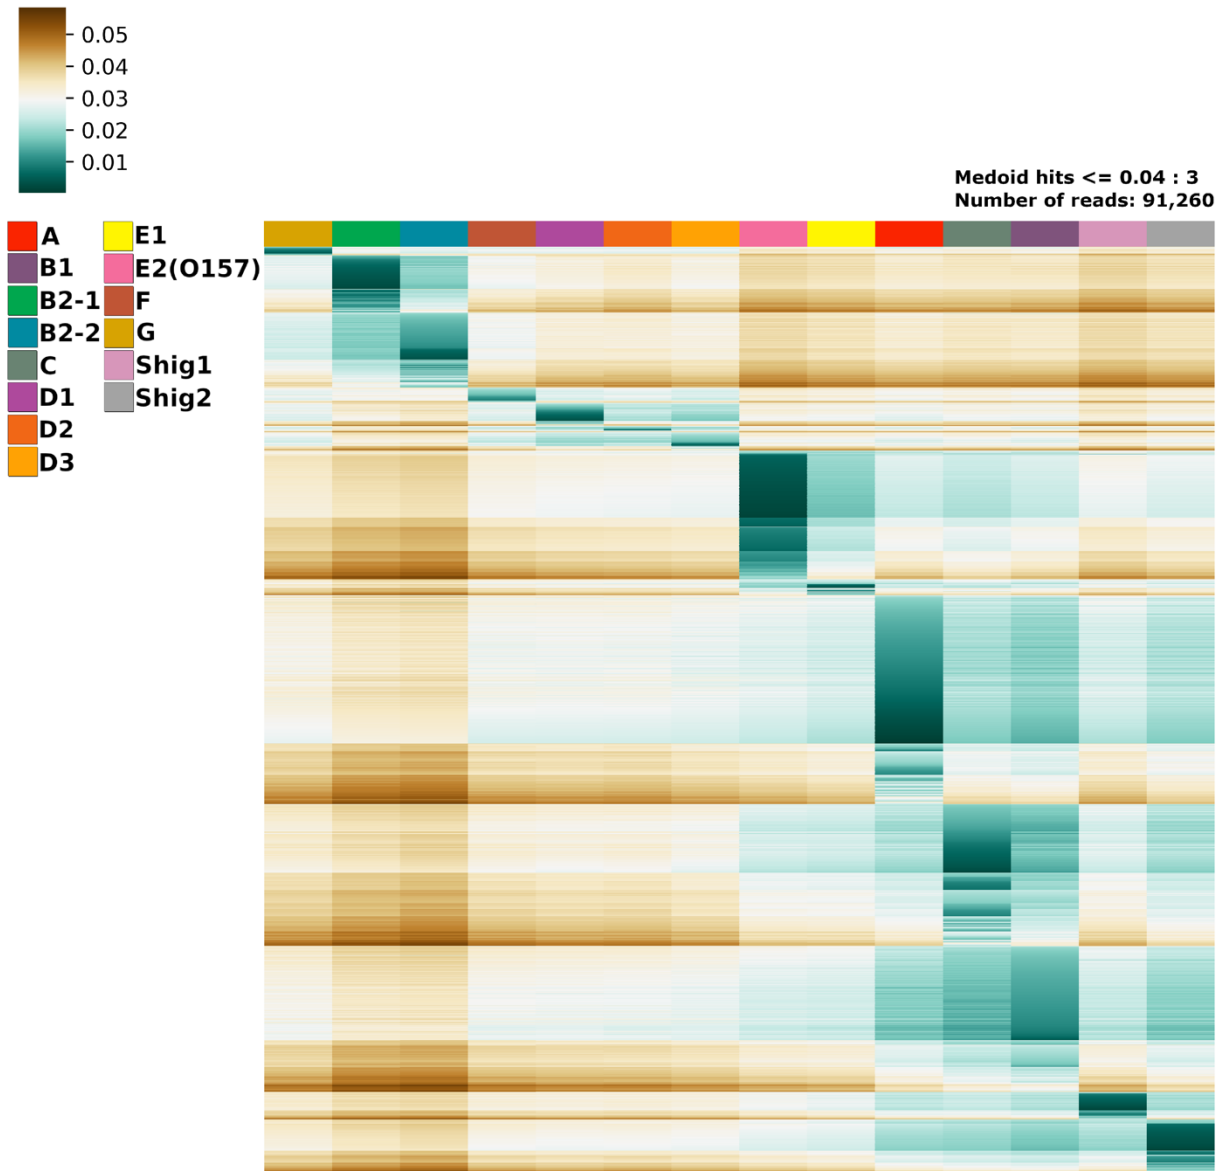

### Supplementary Figure 5

Heatmap of Mash distances for 91,260 SRA reads to each of the 14 medoids. Reads were filtered to any read with a Mash distance  $\leq 0.04$  to at least 3 medoids.

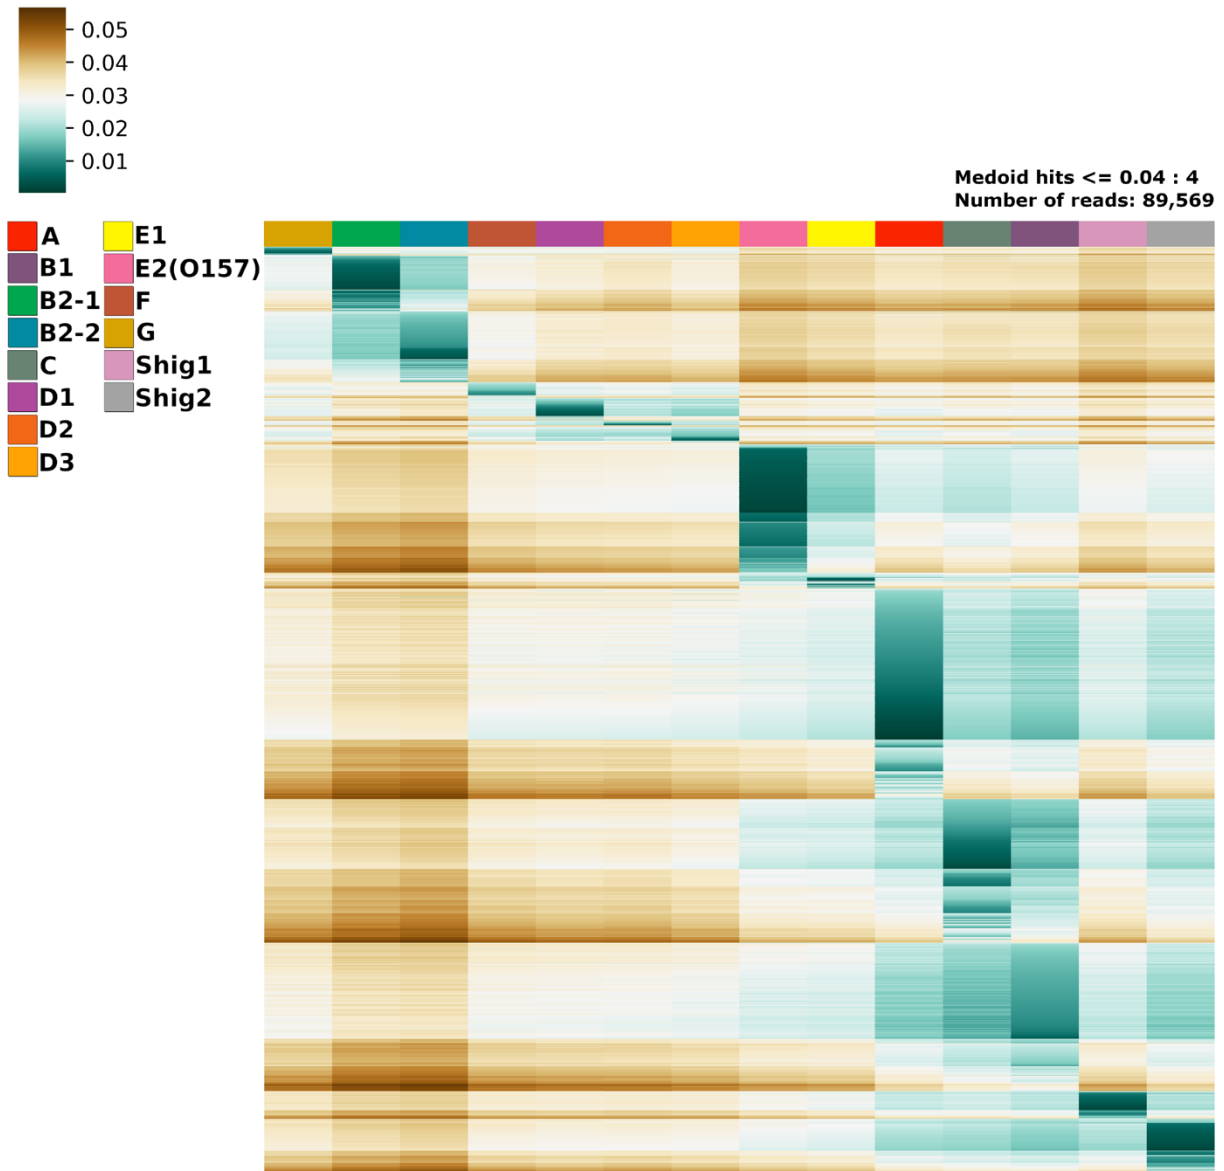

### Supplementary Figure 6

Heatmap of Mash distances for 89,569 SRA reads to each of the 14 medoids. Reads were filtered to any read with a Mash distance  $\leq 0.04$  to at least 4 medoids.

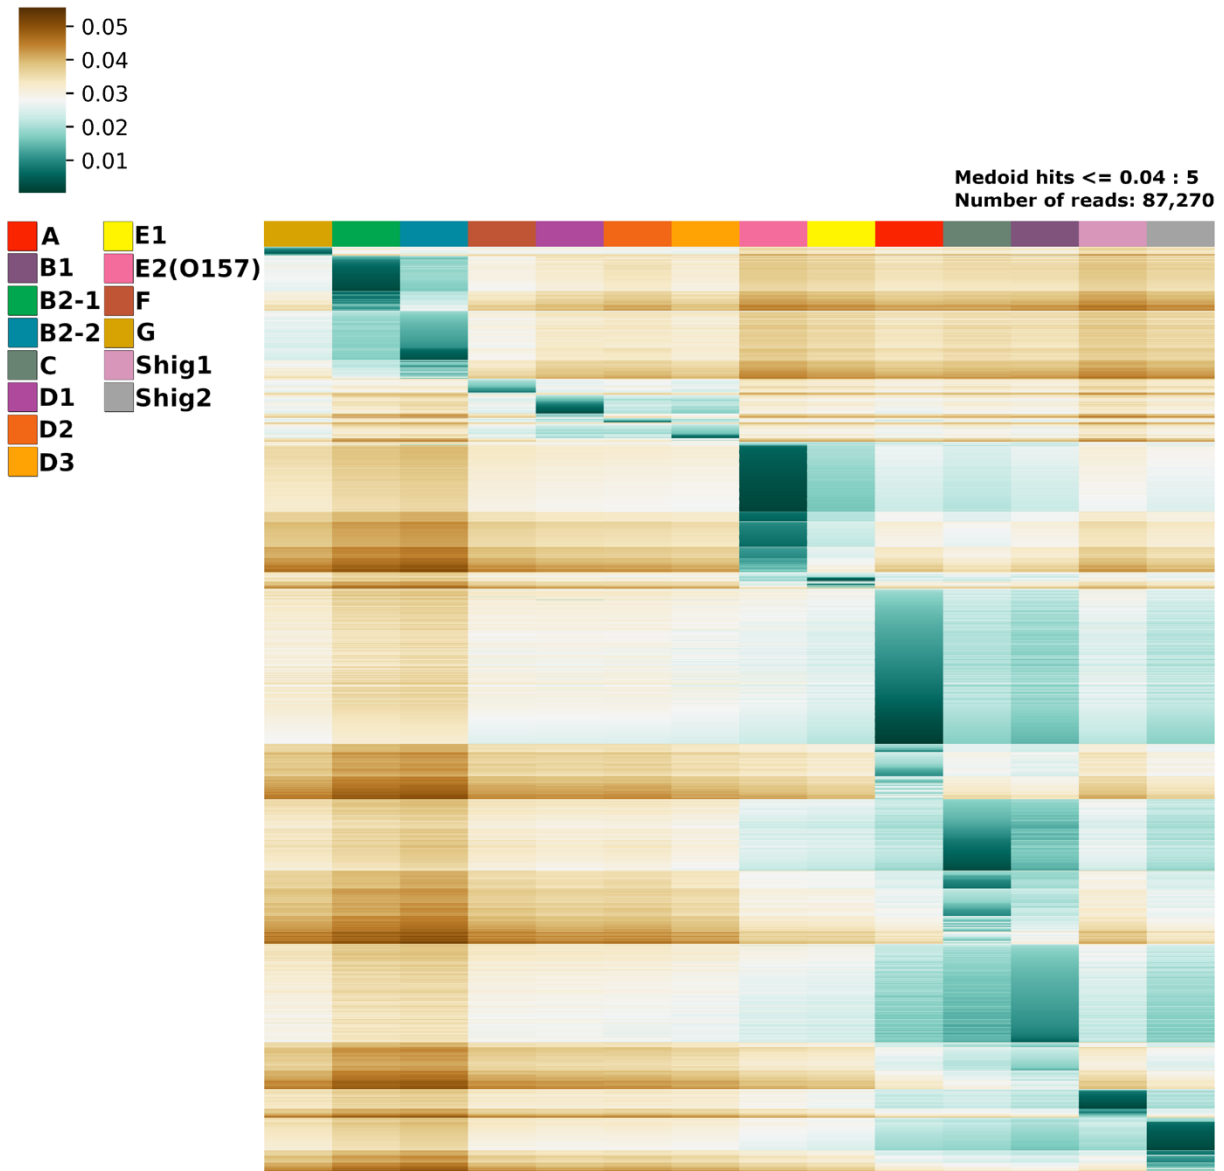

### Supplementary Figure 7

Heatmap of Mash distances for 87,270 SRA reads to each of the 14 medoids. Reads were filtered to any read with a Mash distance  $\leq 0.04$  to at least 5 medoids.

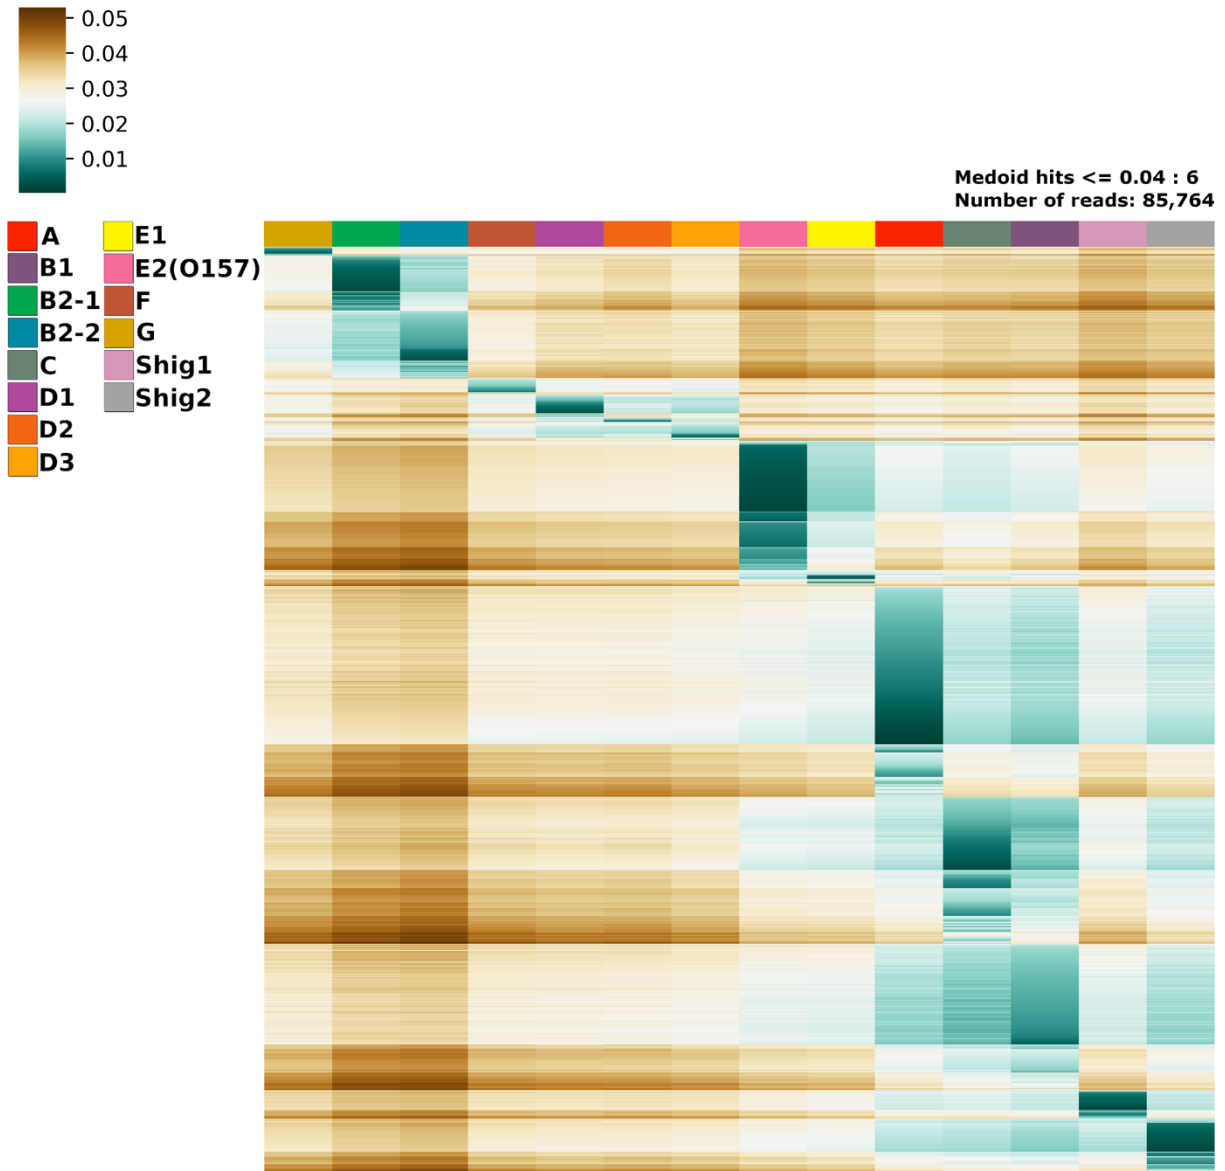

### Supplementary Figure 8

Heatmap of Mash distances for 85,764 SRA reads to each of the 14 medoids. Reads were filtered to any read with a Mash distance  $\leq 0.04$  to at least 6 medoids.



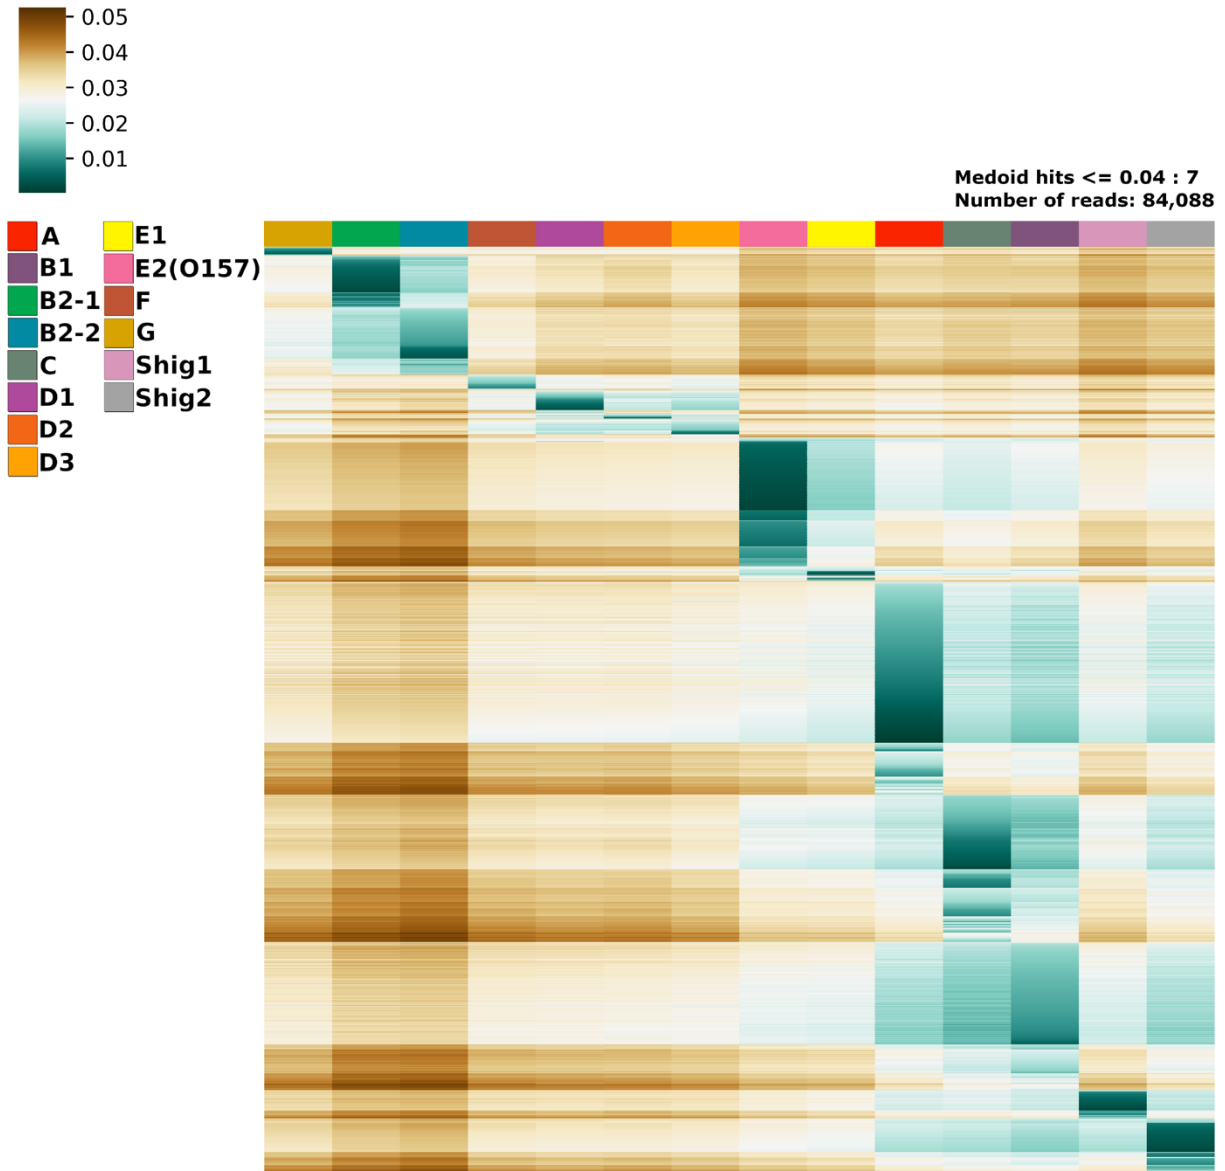

### Supplementary Figure 9

Heatmap of Mash distances for 84,088 SRA reads to each of the 14 medoids. Reads were filtered to any read with a Mash distance  $\leq 0.04$  to at least 7 medoids.

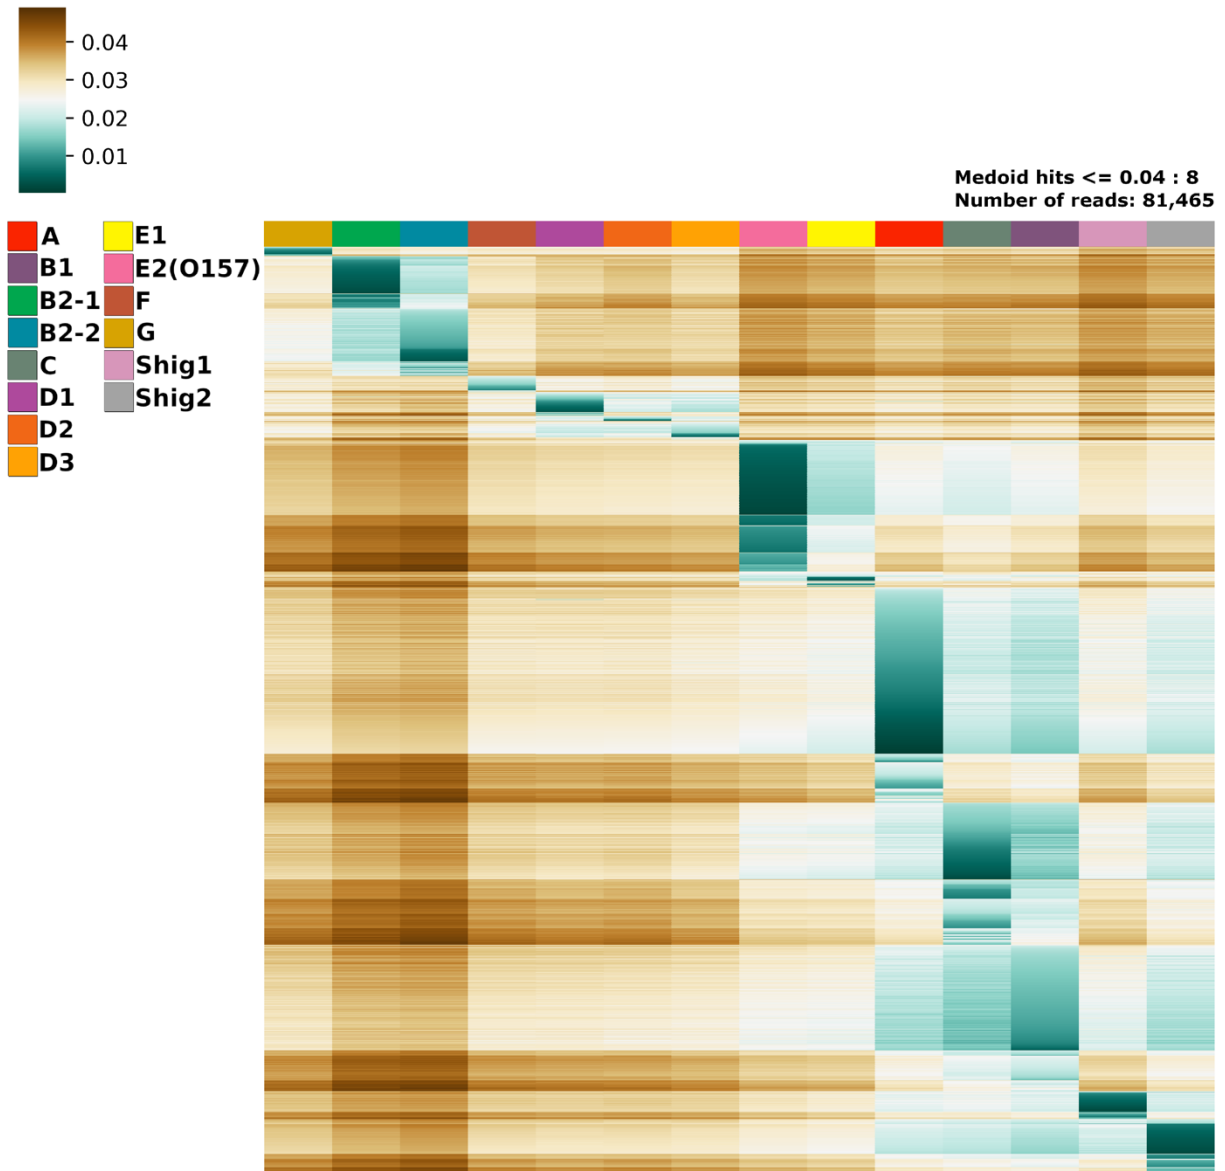

### Supplementary Figure 10

Heatmap of Mash distances for 81,465 SRA reads to each of the 14 medoids. Reads were filtered to any read with a Mash distance  $\leq 0.04$  to at least 8 medoids.

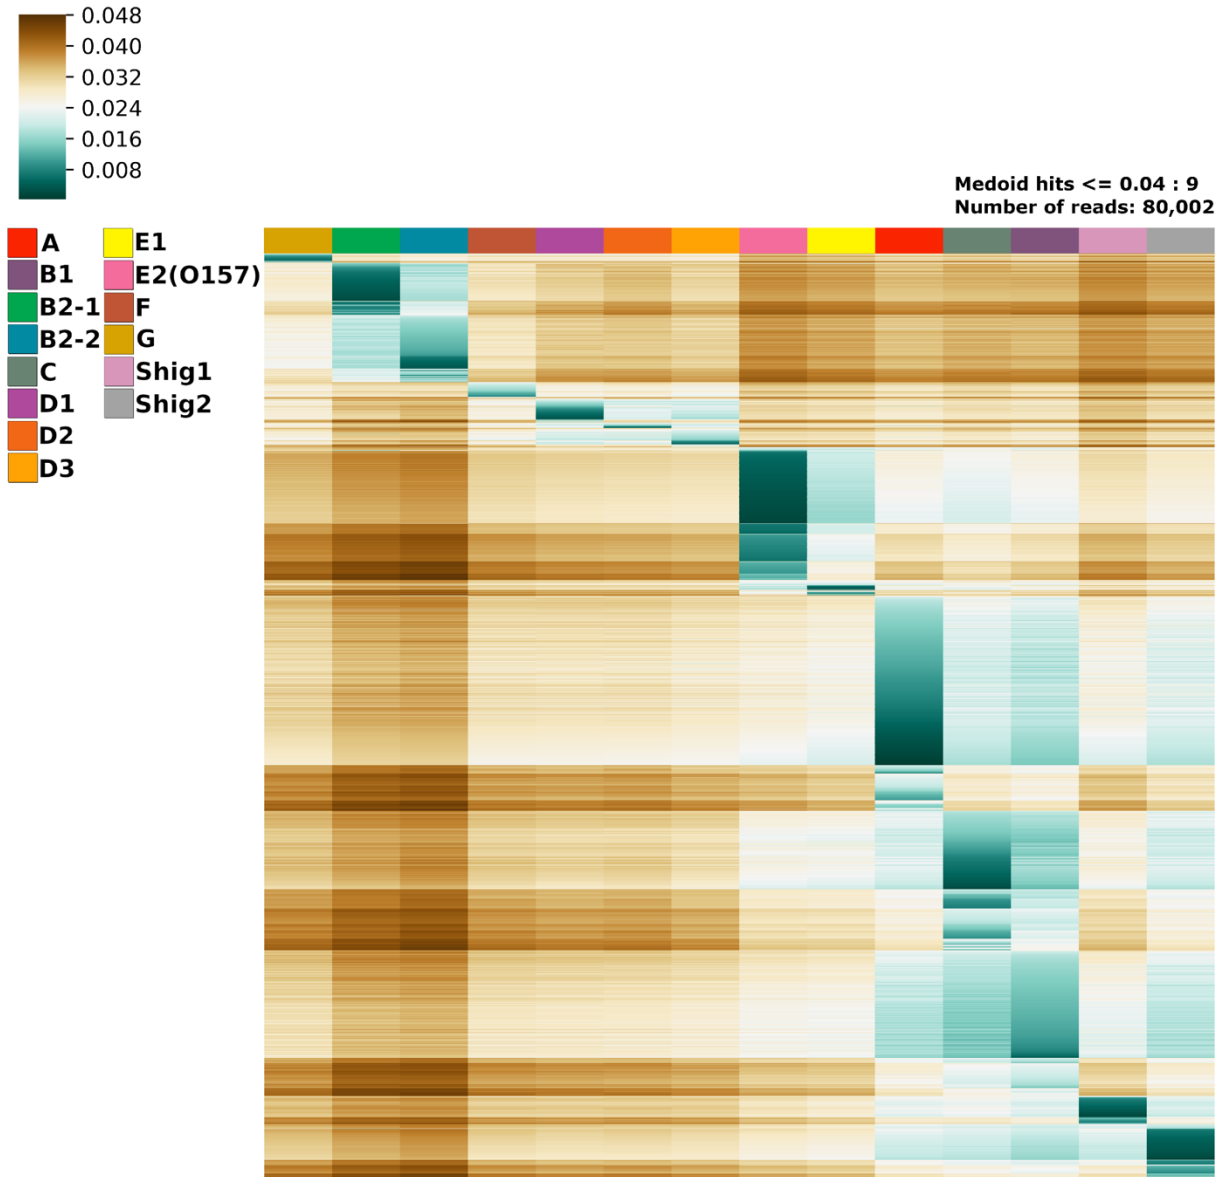

### Supplementary Figure 11

Heatmap of Mash distances for 80,002 SRA reads to each of the 14 medoids. Reads were filtered to any read with a Mash distance  $\leq 0.04$  to at least 9 medoids.

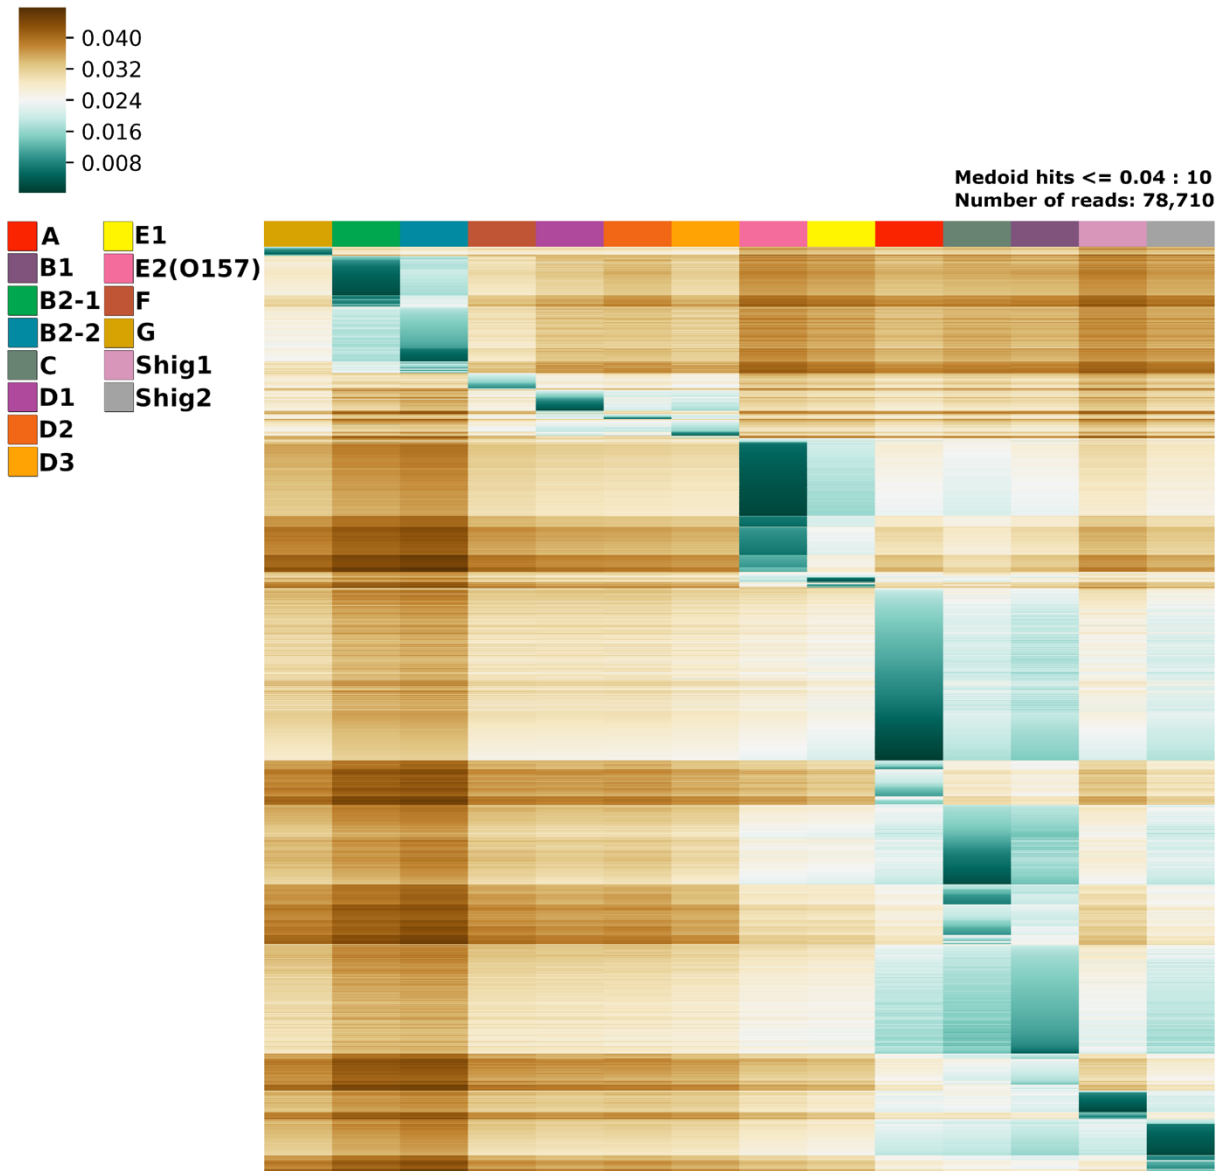

### Supplementary Figure 12

Heatmap of Mash distances for 78,710 SRA reads to each of the 14 medoids. Reads were filtered to any read with a Mash distance  $\leq 0.04$  to at least 10 medoids.

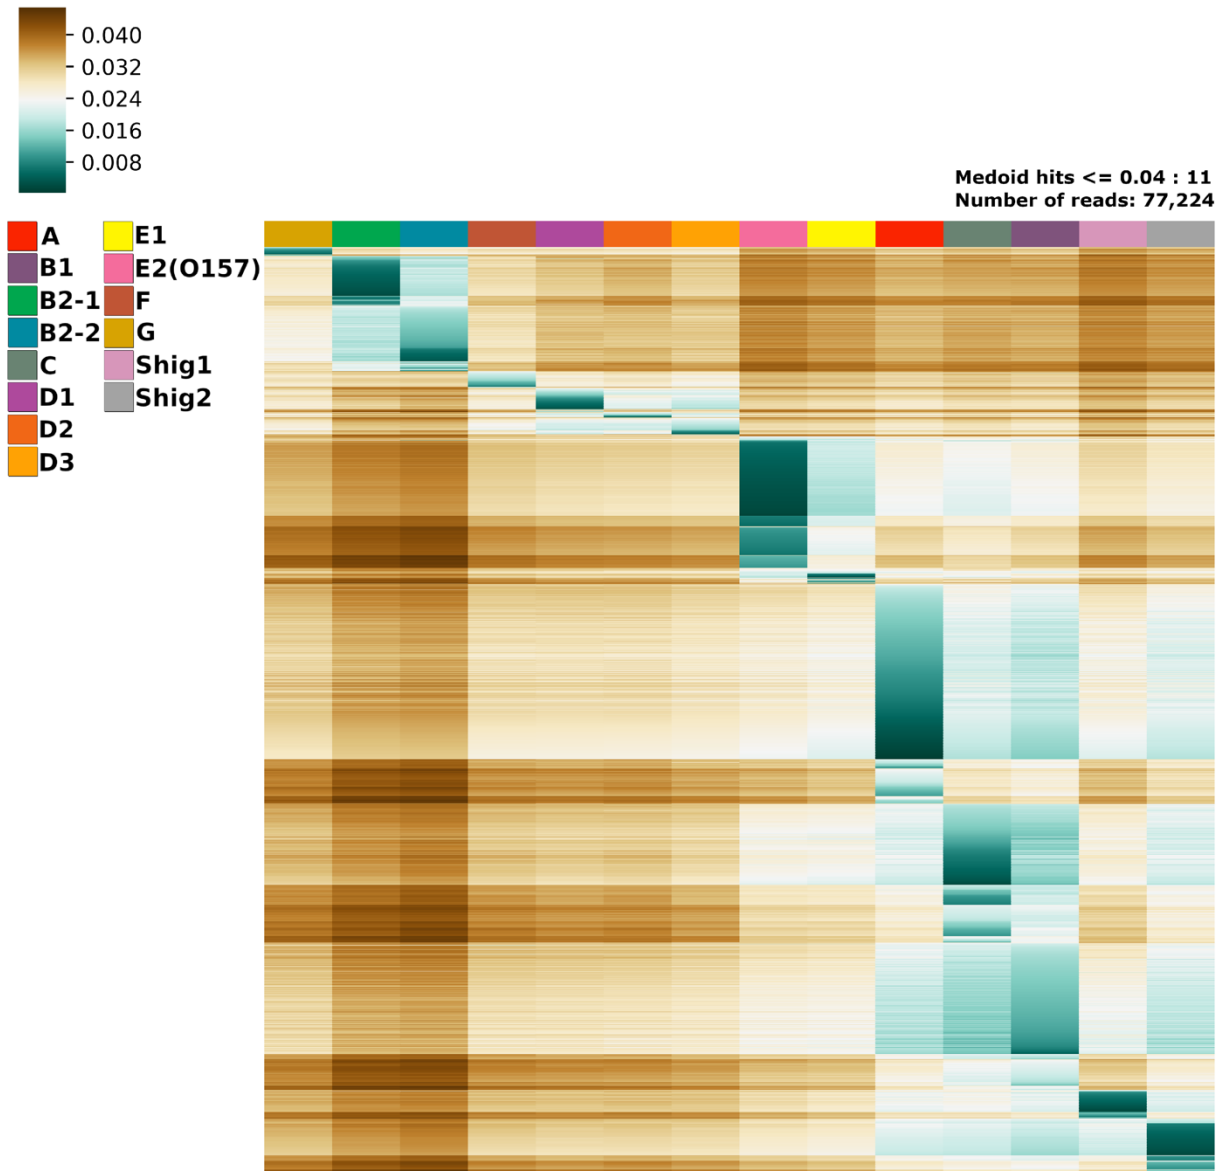

### Supplementary Figure 13

Heatmap of Mash distances for 77,224 SRA reads to each of the 14 medoids. Reads were filtered to any read with a Mash distance  $\leq 0.04$  to at least 11 medoids.

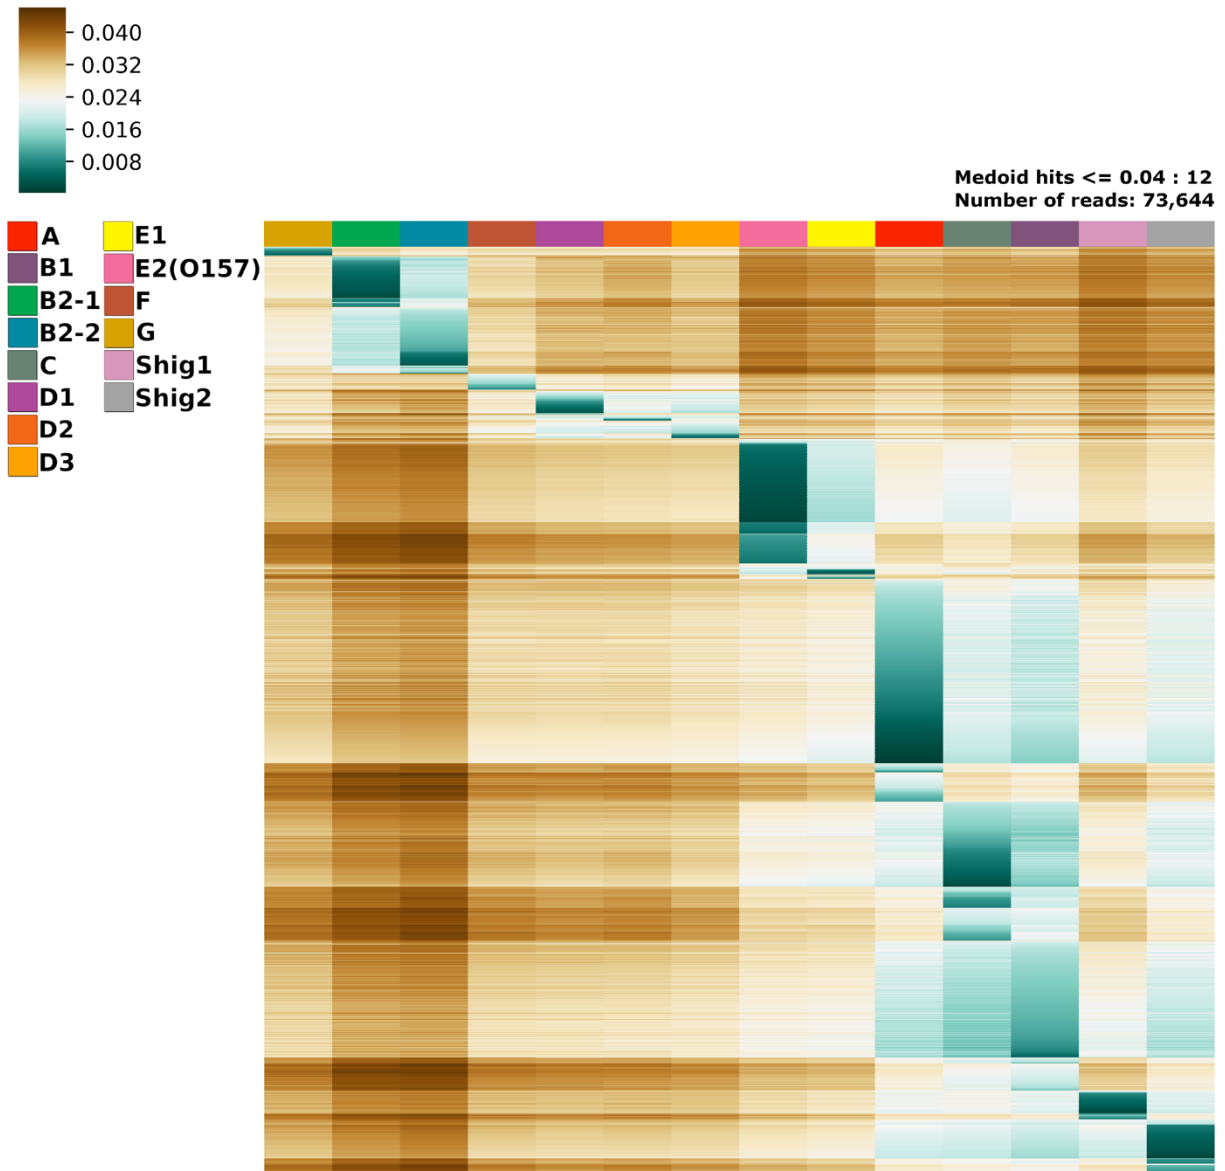

### Supplementary Figure 14

Heatmap of Mash distances for 73,644 SRA reads to each of the 14 medoids. Reads were filtered to any read with a Mash distance  $\leq 0.04$  to at least 12 medoids.

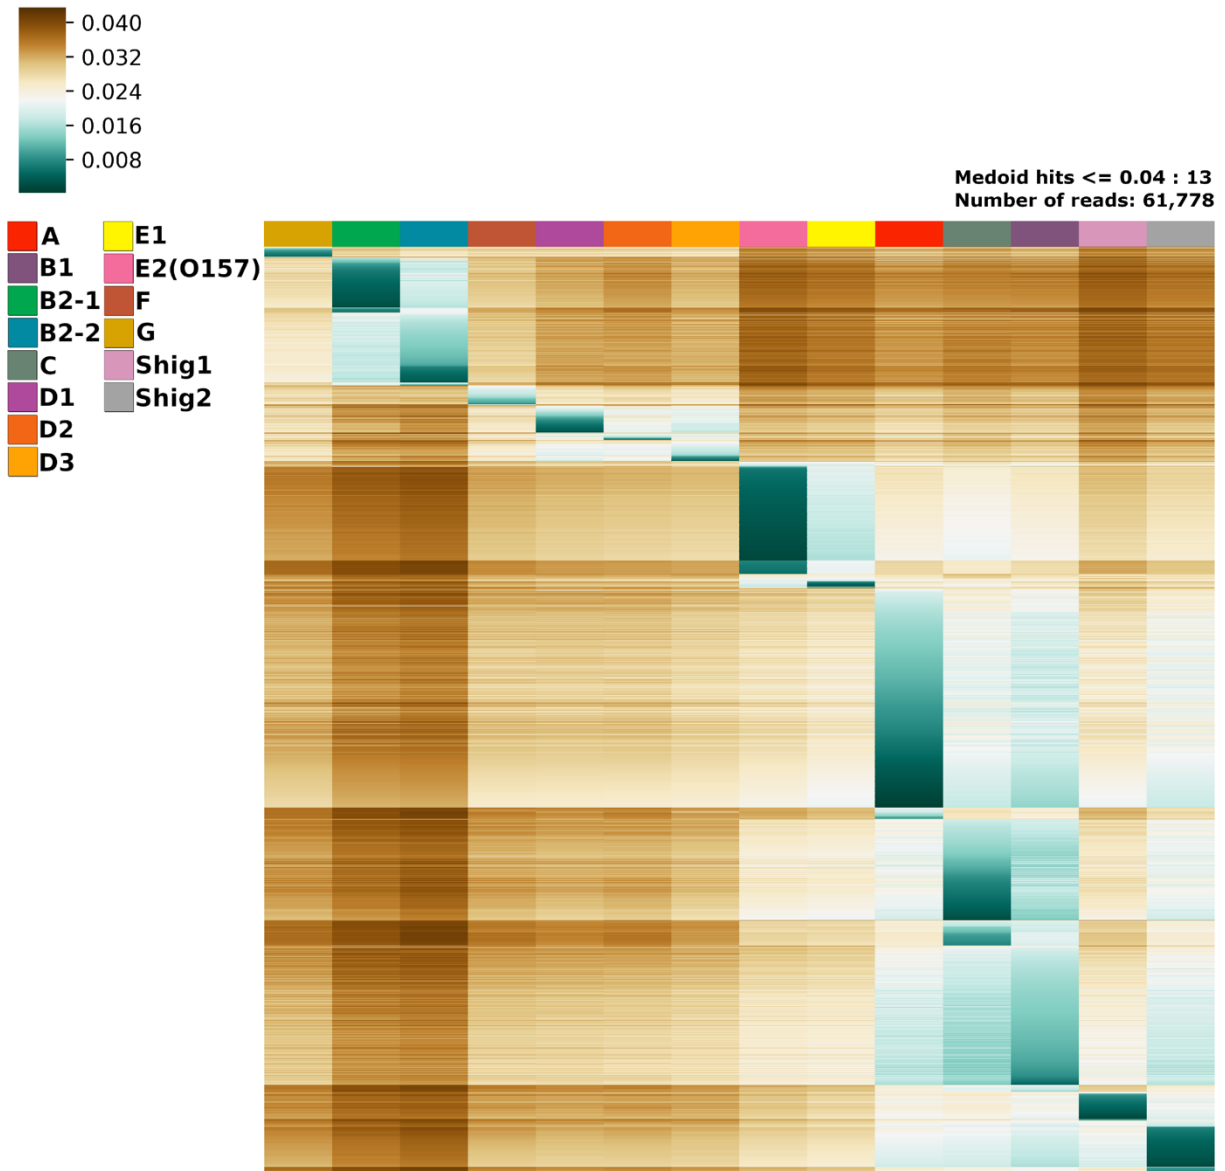

### Supplementary Figure 15

Heatmap of Mash distances for 61,778 SRA reads to each of the 14 medoids. Reads were filtered to any read with a Mash distance  $\leq 0.04$  to at least 13 medoids.

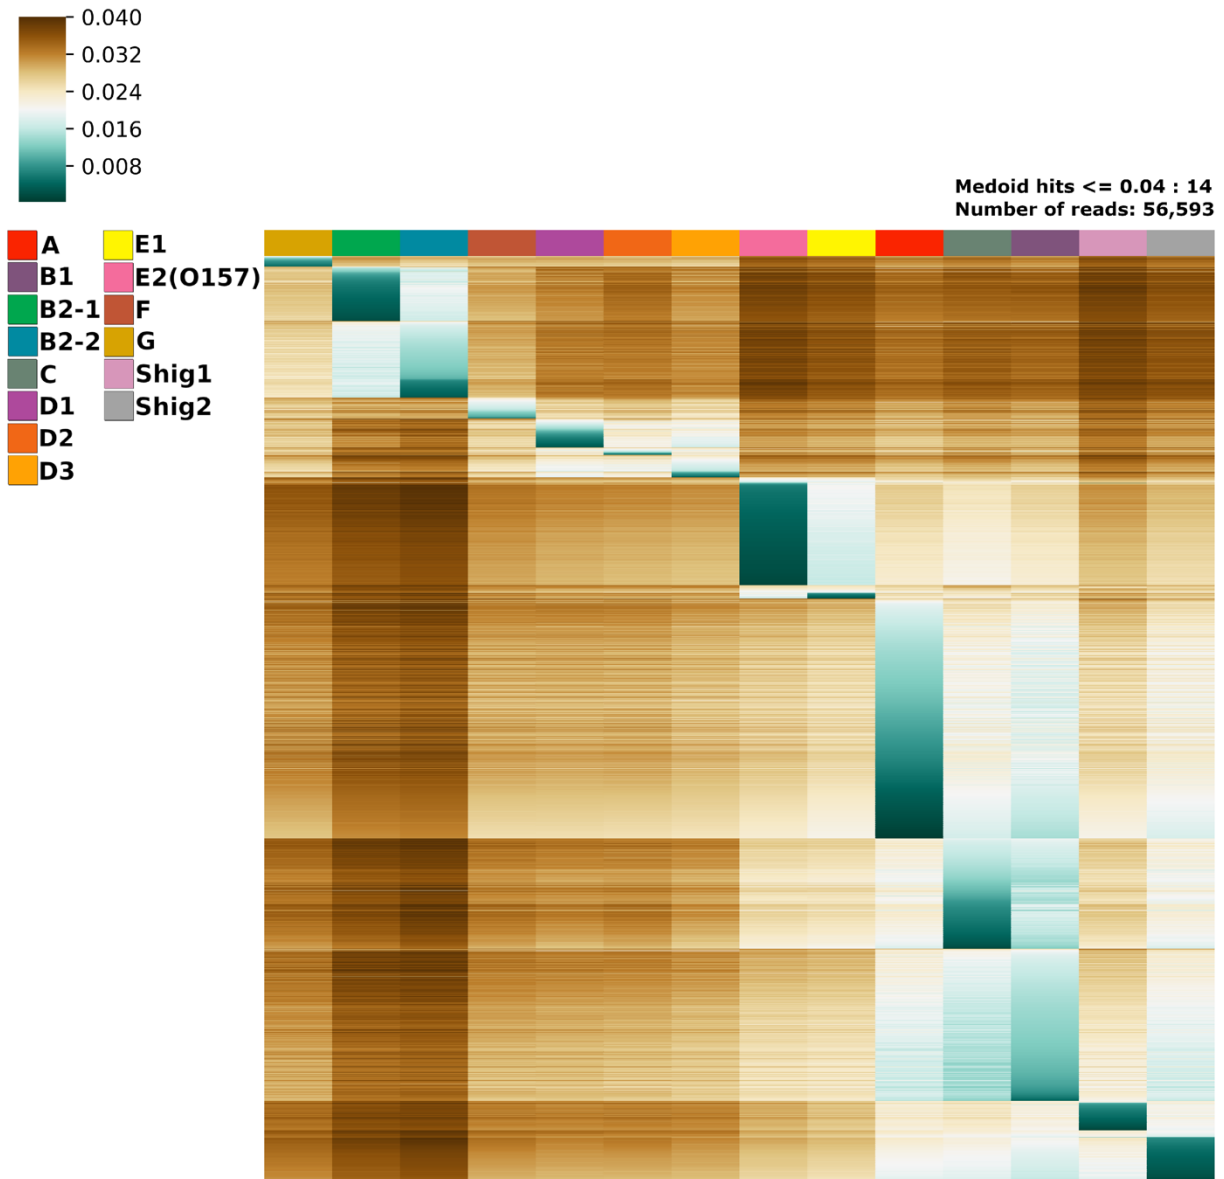

### Supplementary Figure 16

Heatmap of Mash distances for 56,593 SRA reads to each of the 14 medoids. Reads were filtered to any read with a Mash distance  $\leq 0.04$  to all 14 medoids.



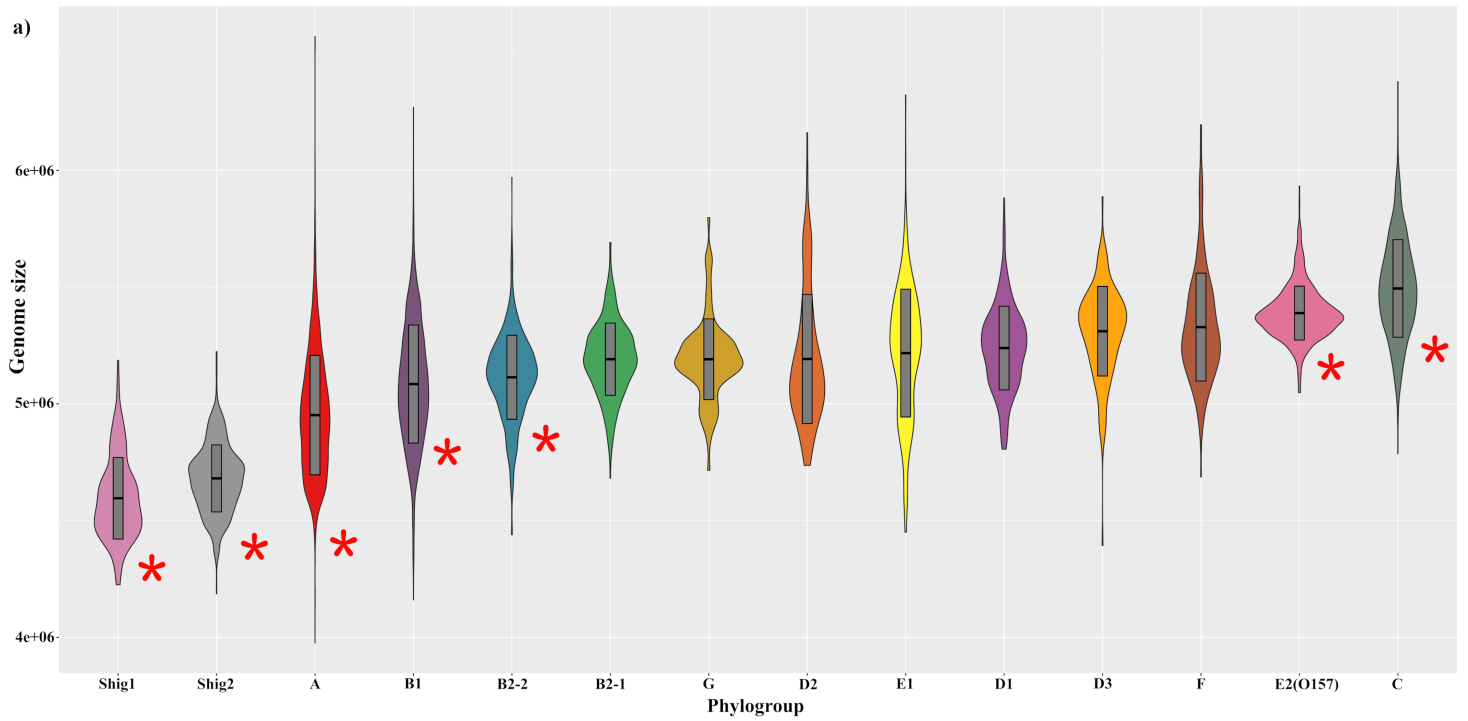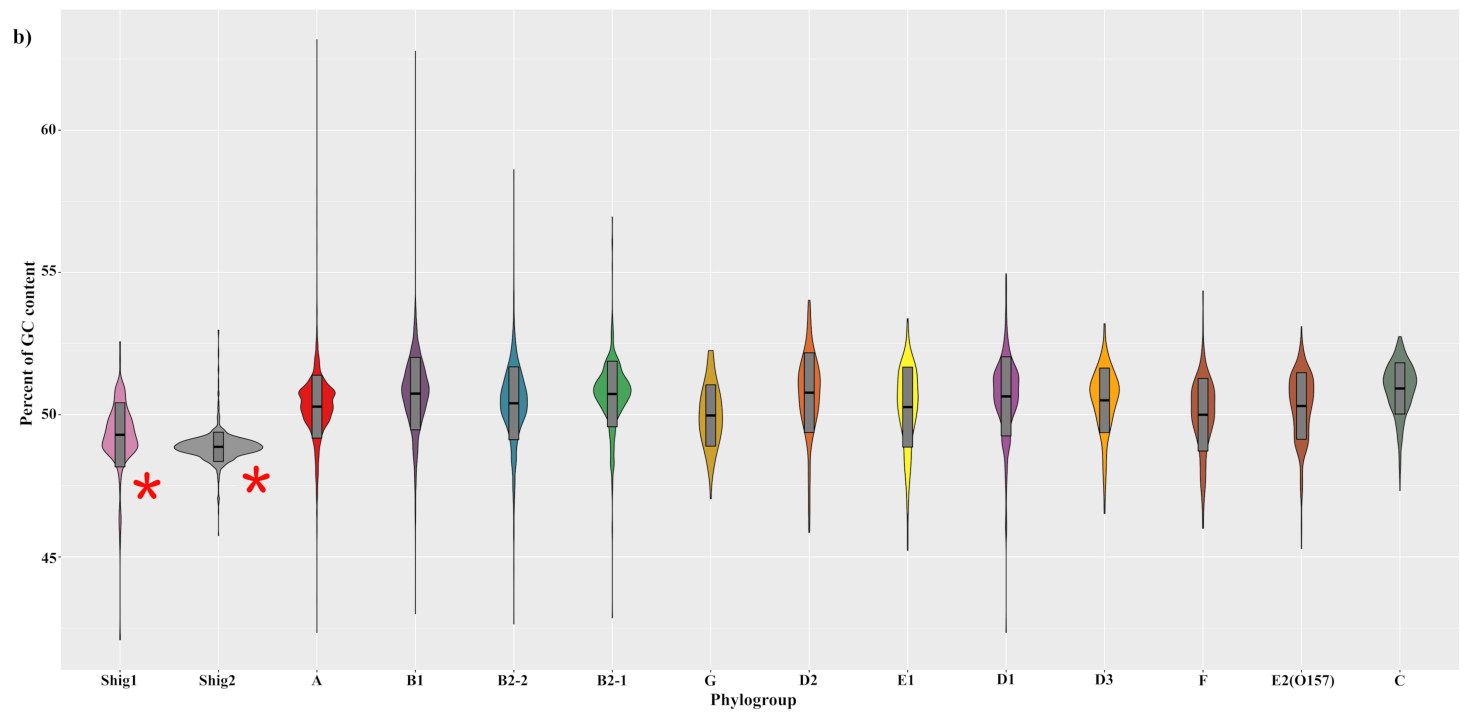

### Supplementary Figure 17

Violin plots of the distribution of genome size (A) and genomic GC content (B) by phylogroup. Bar plots inside the violins represent values for mean and mean plus one standard deviation per phylogroup. Phylogroups that have values significantly different to all other phylogroups (according to F statistics test) are marked with a red asterisk.

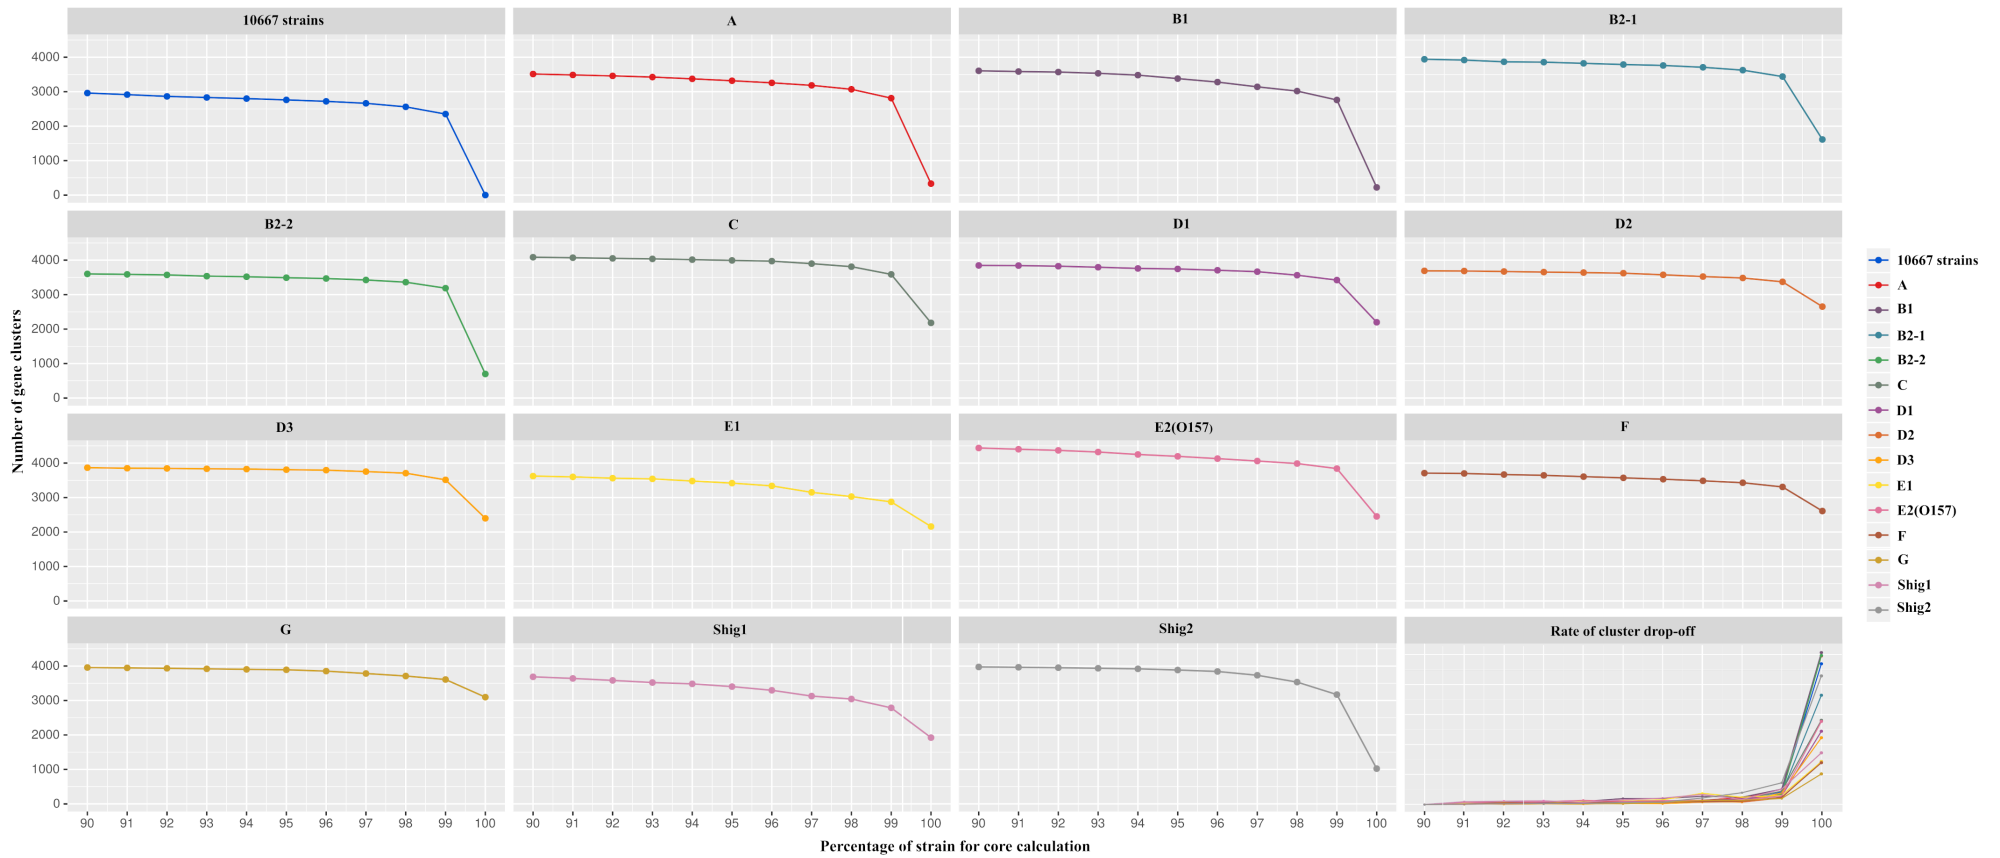

### Supplementary Figure 18

Cut-offs for core genome calculation. Core genomes established at a cutoff of 90% to 100% per phylogroup. The lower right panel titled “Rate of cluster drop-off” illustrates the rate that clusters drop-off as the percent membership increases from 90% to 100% for all phylogroups and the species. The color key corresponding to each phylogroup is on the right side of the figure.

| Species                  | Strain             | Assembly Accession | Size (Mb) | Total Score | Sequence Score | Bioproject  | Biosample    | Phylogroup |
|--------------------------|--------------------|--------------------|-----------|-------------|----------------|-------------|--------------|------------|
| <i>Escherichia coli</i>  | MOD1-EC4358        | GCA_002473875.1    | 5.34623   | 0.91        | 0.62           | PRJNA230969 | SAMN04913985 | E2         |
| <i>Escherichia coli</i>  | MOD1-EC1641        | GCA_002460705.1    | 5.20103   | 0.88        | 0.62           | PRJNA230969 | SAMN05607397 | E1         |
| <i>Shigella flexneri</i> | FC1170             | GCA_002241955.1    | 4.59581   | 0.85        | 0.5            | PRJNA393761 | SAMN07340962 | Shig1      |
| <i>Shigella sonnei</i>   | CDPH_C96           | GCA_001688385.1    | 4.44053   | 0.85        | 0.52           | PRJNA300887 | SAMN04440977 | Shig2      |
| <i>Escherichia coli</i>  | 104                | GCA_900096825.1    | 4.63813   | 0.99        | 0.95           | PRJEB15352  | SAMEA4444105 | A          |
| <i>Escherichia coli</i>  | MOD1-EC3802        | GCA_002516075.1    | 4.61361   | 0.92        | 0.86           | PRJNA230969 | SAMN05440280 | B1         |
| <i>Escherichia coli</i>  | 2014C-4638         | GCA_003015295.1    | 5.77998   | 1           | 0.99           | PRJNA218110 | SAMN03265975 | C          |
| <i>Escherichia coli</i>  | BIDMC 63           | GCA_000692435.1    | 5.16234   | 0.99        | 0.97           | PRJNA234151 | SAMN02581284 | B2-1       |
| <i>Escherichia coli</i>  | GSK25213           | GCA_000807565.1    | 4.94925   | 0.9         | 0.71           | PRJNA221787 | SAMN03169672 | B2-2       |
| <i>Escherichia coli</i>  | FVEC1412           | GCA_000163235.1    | 5.23418   | 0.95        | 0.79           | PRJNA39917  | SAMN02595360 | D1         |
| <i>Escherichia coli</i>  | MOD1-EC5921        | GCA_002534845.1    | 4.7781    | 0.95        | 0.88           | PRJNA230969 | SAMN05452849 | D2         |
| <i>Escherichia coli</i>  | HVH 65 (4-2262045) | GCA_000456945.1    | 5.31618   | 0.97        | 0.9            | PRJNA186093 | SAMN01885720 | D3         |
| <i>Escherichia coli</i>  | WB61               | GCA_002966755.1    | 4.68705   | 1           | 1              | PRJNA374983 | SAMN06341081 | F          |
| <i>Escherichia coli</i>  | MOD1-EC6621        | GCA_002485345.1    | 4.90502   | 0.92        | 0.79           | PRJNA230969 | SAMN04992451 | G          |

### Supplementary Table 1

A selection of metadata for the 14 medoids utilized in the analyses of this work. Additional information can be found in the metadata of the Microreact associated with this project: <https://microreact.org/project/10667ecoli/c38356ec>.
